# Supplementary material for: Natively oxidized 2D NbSe2 enables ultralow-power electrical switching
Source: Royal Society of Chemistry journal article supplement (doi:10.1039/d4tc04697h), 2025-01-01
Supplement: d4tc04697h1.pdf [file d4tc04697h1.pdf]

Supplementary Information

**Natively oxidized 2D NbSe<sub>2</sub> enables ultralow-power electrical switching**

Changying Xiong,<sup>a,b,#</sup> Feiyu Tang,<sup>a,#</sup> Meng Xu,<sup>c,#</sup> Jiahao Shen,<sup>a</sup> Yi Li,<sup>a,b</sup> Kan-Hao  
Xue,<sup>a,b</sup> Ming Xu,<sup>a,b,\*</sup> and Xiangshui Miao<sup>a,b</sup>

*<sup>a</sup>Wuhan National Laboratory for Optoelectronics, School of Integrated Circuits,  
Huazhong University of Science and Technology, Wuhan 430074, China*

*<sup>b</sup>Hubei Yangtze Memory Laboratories, Wuhan, 430205, China*

*<sup>c</sup>Department of Electrical and Electronic Engineering, the University of Hong Kong,  
Hong Kong, China*

<sup>#</sup>C.X., F.T., and M.X. contributed equally to this work.

\*Authors to whom correspondence should be addressed: [mxu@hust.edu.cn](mailto:mxu@hust.edu.cn)

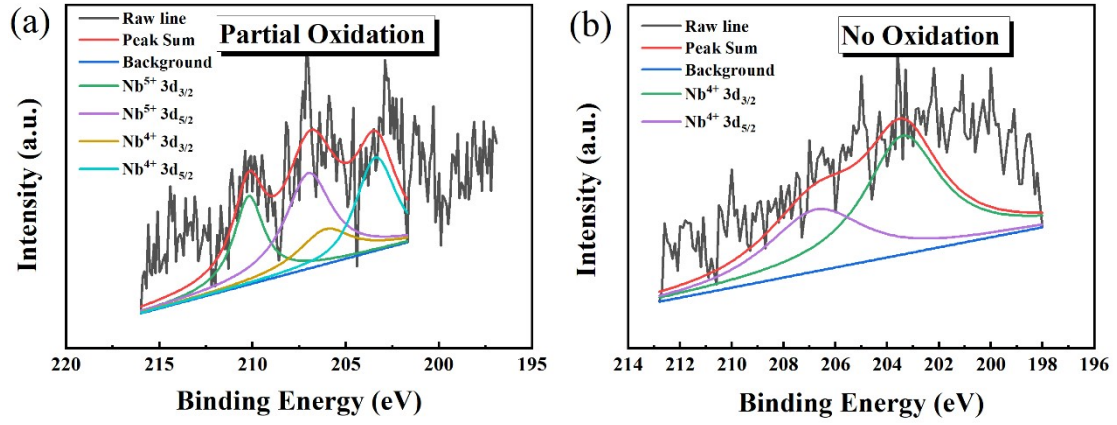

**Fig. S1** XPS spectra for binding energies of NbSe<sub>2</sub> films. (a) In the partially oxidized sample, both Nb<sup>4+</sup> and Nb<sup>5+</sup> exhibit 3d<sub>5/2</sub> and 3d<sub>3/2</sub> peak positions. (b) In the non-oxidation sample, only the 3d<sub>5/2</sub> and 3d<sub>3/2</sub> peak positions of Nb<sup>4+</sup> exist.

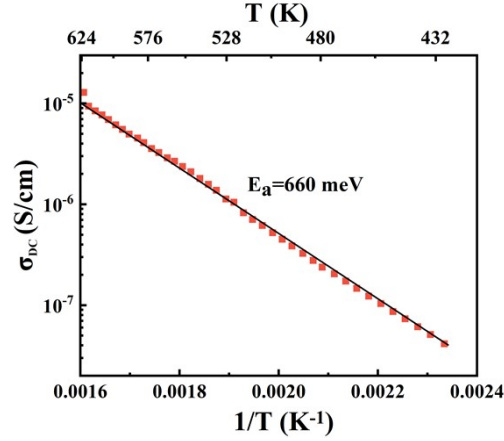

**Fig. S2** Logarithm of the conductance of single crystal  $\alpha$ - $\text{Nb}_2\text{O}_5$  as a function of  $1/T^1$

Calculation of the functional layer resistance in devices

The calculation process is as follows:

As shown in **Fig. S2**, the relationship between resistivity and temperature in the graph can be expressed in the following equation form:

$$\lg \sigma = k \times \frac{1}{T} + b$$

Substitute the coordinates of two points into the analytical equation of a straight line:

$$(0.0016, -5), (0.0022, -7)$$

The analytical expression of the equation is obtained as:

$$\lg \sigma = -3.33 \times 10^3 \times \frac{1}{T} + 0.33$$

Set T to room temperature ( $T=298.15$  K), the obtained result is:

$$\lg \sigma = -10.84$$

$$\sigma = 10^{-10.84} \text{ S/cm}$$

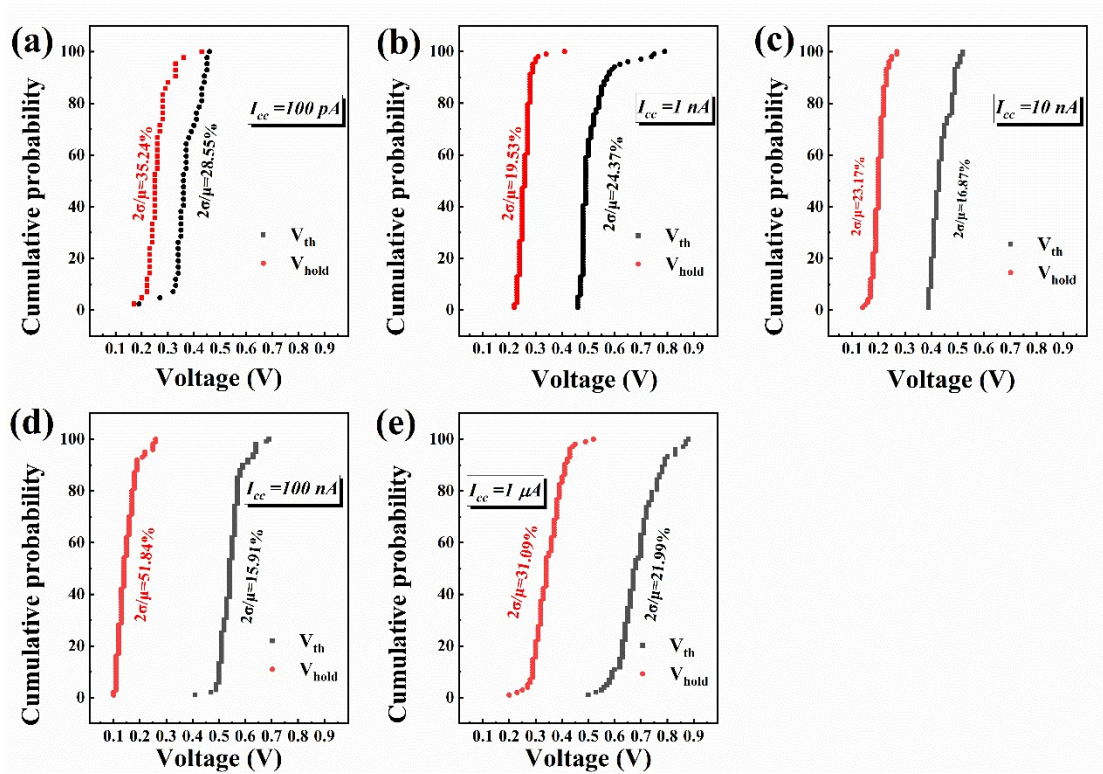

**Fig. S3** The cumulative probability distribution of the device's threshold voltage and holding voltage under different compliance currents.

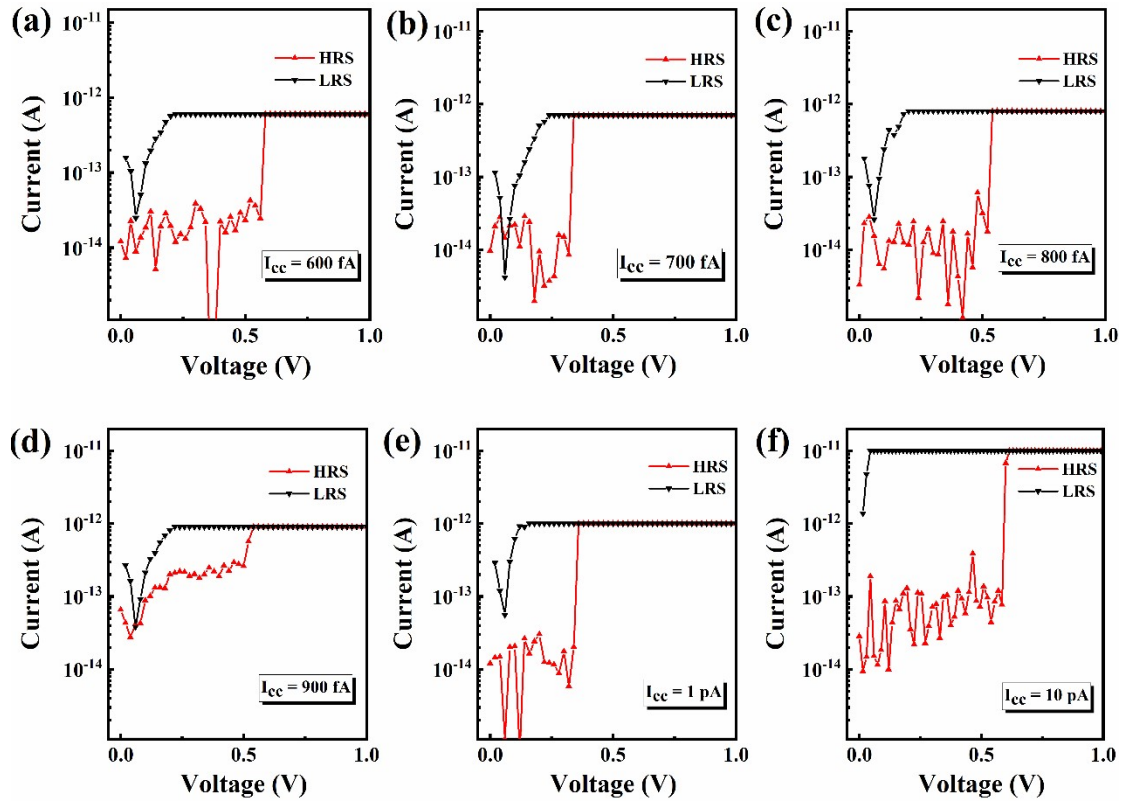

**Fig. S4** The DC characteristics of the device under six different compliance currents, from 600 fA to 10 pA with the bias at 1 V.

**Table S1** Comparison for similar work that utilized 2D materials or similar compounds to achieve low power consumption and high endurance.

| <b>Materials</b>                                       | <b>U<sub>set</sub> (V)</b> | <b>W<sub>set</sub> (J)</b>  | <b>Endurance</b>      | <b>Data</b>          |
|--------------------------------------------------------|----------------------------|-----------------------------|-----------------------|----------------------|
| DG/SiO <sub>2</sub>                                    | 0.675                      | 3.5×10 <sup>-11</sup>       | 10 <sup>5</sup>       | Zhao <sup>2</sup>    |
| Nb <sub>2</sub> O <sub>5</sub> /NbO <sub>2</sub>       | 1.5                        | 3.3×10 <sup>-11</sup>       | 10 <sup>6</sup>       | Kim <sup>3</sup>     |
| AgGeSe/Al <sub>2</sub> O <sub>3</sub>                  | 0.5                        | 1.5×10 <sup>-15</sup>       | 10 <sup>5</sup>       | Tian <sup>4</sup>    |
| TiSe <sub>2</sub> /TiO <sub>2</sub> /TiSe <sub>2</sub> | 0.845                      | 2.39×10 <sup>-16</sup>      | 10 <sup>2</sup>       | Xiong <sup>5</sup>   |
| HfSe <sub>x</sub> O <sub>y</sub> /HfSe <sub>2</sub>    | 2.5                        | 1.6×10 <sup>-16</sup>       | 40                    | Liu <sup>6</sup>     |
| NbSe <sub>2</sub> /NbO <sub>x</sub>                    | 1                          | /                           | 20                    | Kim <sup>7</sup>     |
| Ti: NbO <sub>2</sub>                                   | 2.5                        | 2.5×10 <sup>-18</sup>       | ~10 <sup>5</sup>      | Jeon <sup>8</sup>    |
| pV3D3/MLG                                              | 3                          | >9×10 <sup>-14</sup>        | 100                   | Jang <sup>9</sup>    |
| HfO <sub>x</sub>                                       | 3.5                        | 3.5×10 <sup>-13</sup>       | 120                   | Wang <sup>10</sup>   |
| BN/SiO <sub>2</sub>                                    | 1.3                        | 1.3×10 <sup>-11</sup>       | 2×10 <sup>4</sup>     | Ranjan <sup>11</sup> |
| <b>NbSe<sub>2</sub>/Nb<sub>2</sub>O<sub>5</sub></b>    | <b>0.5</b>                 | <b>6.3×10<sup>-19</sup></b> | <b>10<sup>6</sup></b> | <b>This Work</b>     |

## References

- 1 G. Nanda, E. W. Awin, T. Gasyak, E. Koroleva, A. Filimonov, S. Vakhrushev, R. Sujith and R. Kumar, *Ceram. Inter.*, 2020, 46, 9512-9518.
- 2 X. Zhao, J. Ma, X. Xiao, Q. Liu, L. Shao, D. Chen, S. Liu, J. Niu, X. Zhang and Y. Wang, *Adv. Mater.*, 2018, 30, 1705193.
- 3 S. Kim, X. Liu, J. Park, S. Jung, W. Lee, J. Woo, J. Shin, G. Choi, C. Cho, S. Park, D. Lee, E. J. Cha, B. H. Lee, H. D. Lee, S. G. Kim, S. Chung and H. Hwang, in 2012 2012 Symposium on VLSI Technology (VLSIT), 2012, 155-156.
- 4 T. Q. Wan, Y. F. Lu, J. H. Yuan, H. Y. Li and X. S. Miao, *IEEE Electron Device Lett.*, 2021, 4, 613-616.
- 5 C. Xiong, Z. Yang, J. Shen, F. Tang, Q. He, Y. Li, M. Xu and X. Miao, *ACS Appl. Mater. Interfaces*, 2023, 15, 23371-23379
- 6 L. Liu, Y. Li, X. Huang, J. Chen, Z. Yang, K. H. Xue, M. Xu, H. Chen, P. Zhou and X. Miao, *Adv. Sci.*, 2021, 8, 2005038.
- 7 J. E. Kim, V. Vu, T. T. H. Vu, T. L. Phan, Y. R. Kim, W. T. Kang, K. Kim, Y. H. Lee and W. J. Yu, *Appl. Sci.*, 2020, 10, 7598.
- 8 D. S. Jeon, T. D. Dongale and T. G. Kim, *J. Alloy. Compd.*, 2021, 884, 161041.
- 9 B. C. Jang, H. Seong, J. Y. Kim, B. J. Koo, S. K. Kim, S. Y. Yang, S. G. Im and S. Y. Choi, *2D Mater.*, 2015, 2, 044013.
- 10 M. Wang, H. B. Lv, Q. Liu, Y. T. Li, Z. G. Xu, S. B. Long, H. W. Xie, K. W. Zhang, X. Y. Liu, H. T. Sun, X. Y. Yang and M. Liu, *IEEE Electron Device Lett.*, 2012, 33, 1556-1558.
- 11 H. Ranjan, C. P. Singh, V. P. Singh and S. K. Pandey, *Materials Science in Semiconductor Processing*, 2024, 183, 108744.
